# Supplementary material for: Tuning the photochromic properties of chromophores containing a nitrile-rich acceptor: a novel branch in the investigation of negative photochromes
Source: Royal Society of Chemistry journal article supplement (doi:10.1039/c9nj01648a), 2019-01-01
Supplement: c9nj01648a1.pdf [file c9nj01648a1.pdf]

*Electronic Supplementary Information for*

**Tuning the photochromic properties of chromophores containing a nitrile-rich acceptor: a novel branch in the investigation of negative photochromes**

Mikhail Yu. Belikov, Mikhail Yu. Ievlev,\* Sergey V. Fedoseev, Oleg V. Ershov

Ulyanov Chuvash State University, Moskovskiy pr. 15, Cheboksary, Russia.

\*E-mail: [hiliam@bk.ru](mailto:hiliam@bk.ru)

**Contents**

|                                                                  |      |
|------------------------------------------------------------------|------|
| 1. Experimental.....                                             | S-2  |
| 1.1 General remarks.....                                         | S-2  |
| 1.2. Synthetic procedures and spectral data.....                 | S-2  |
| 2. Absorption spectra.....                                       | S-6  |
| 3. Kinetic curves for the reverse thermal transformation .....   | S-7  |
| 4. Fatigue resistance of the photo-thermal transformations ..... | S-9  |
| 5. NMR $^1\text{H}$ , $^{13}\text{C}$ spectra .....              | S-10 |

## 1. Experimental

### 1.1 General remarks

The progress of reactions and the purity of products were monitored by TLC on Sorbfil plates (spots were visualized under UV light, by treatment with iodine vapor, or by heating). The IR spectra were recorded on a FSM-1202 spectrometer with Fourier transform from samples dispersed in mineral oil. The NMR spectra were measured in DMSO-*d*<sub>6</sub> on Bruker DRX-500 and AV600 spectrometers using tetramethylsilane as an internal reference. Elemental analyses were performed using a Perkin–Elmer 2400 CHN elemental analyzer. The mass spectra were obtained on a gas chromatograph mass spectrometer Shimadzu GCMS-QP2010S. The UV spectra were recorded on an Agilent Cary 60 UV-Vis Spectrophotometer. Melting points were determined on an OptiMelt MPA100 device. To study the photochromic behavior of compounds, the solutions were irradiated with non-filtered visible light by LED XM-LT6 CREE (spectral range of 400-700 nm, a luminous power density equal to 205 mW/cm<sup>2</sup>).

### 1.2 Synthetic procedures and spectral data

*Synthesis of (E)-2-(3-cyano-4-(2-hydroxystyryl)-5,5-dimethylfuran-2(5H)-ylidene)malononitrile 1a*

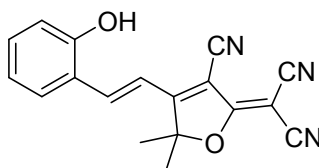

To a suspension of 0.199 g (1 mmol) of TCF acceptor in 2 mL of 96% ethanol 1.05 mmol of 2-hydroxybenzaldehyde and 0.077 g (1 mmol) of dry ammonium acetate were added. The resulting mixture was stirred at 40-50°C for 10 min, then for 2 h at room temperature (TLC controlled). After the reaction completion, the mixture was cooled to 0-5 °C then precipitated product was filtered, washed with cold ethanol and dried in a vacuum desiccator over CaCl<sub>2</sub> to constant weight. Mp 294–295 °C (dec.). <sup>1</sup>H NMR (500.13 MHz, DMSO-*d*<sub>6</sub>): δ 1.78 (6H, s, 2CH<sub>3</sub>), 6.91-6.98 (2H, m, C<sub>6</sub>H<sub>4</sub>), 7.37 (1H, t, *J* = 7.7 Hz, C<sub>6</sub>H<sub>4</sub>), 7.42 (1H, d, *J* = 16.5, Hz, CH=), 7.84 (1H, d, *J* = 7.7 Hz, C<sub>6</sub>H<sub>4</sub>), 8.18 (1H, d, *J* = 16.5 Hz, CH=), 10.83 (1H, s, OH). <sup>13</sup>C NMR (125.67 MHz, DMSO-*d*<sub>6</sub>): δ 25.09, 53.71, 97.37, 99.00, 111.15, 111.88, 112.73, 115.00, 116.50, 119.71, 121.22, 130.47, 133.97, 143.91, 158.35, 176.18, 177.22. MS, (EI, 70 eV): *m/z* (%) 303 [M]<sup>+</sup> (64), 288 [M-Me]<sup>+</sup> (24), 218 (100). IR (mineral oil, cm<sup>-1</sup>): 3255 (OH, NH), 2232 (CN). 1575 (C=C). Anal. Calcd for C<sub>18</sub>H<sub>13</sub>N<sub>3</sub>O<sub>2</sub>: C, 71.28; H, 4.32; N, 13.85. Found: C, 71.16; H, 4.39; N, 13.74.

*(E)*-2-(3-cyano-5-hydroxy-4-(2-hydroxystyryl)-5-methyl-1*H*-pyrrol-2(5*H*)-ylidene)malononitrile **1b**

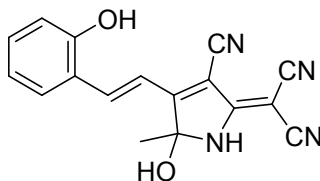

To a suspension of 0.2 g (1 mmol) of 2-(3-cyano-5-hydroxy-4,5-dimethyl-1*H*-pyrrol-2(5*H*)-ylidene)malononitrile **HTCP** in 2 mL of 96% ethanol 1.05 mmol of 2-hydroxybenzaldehyde and 0.077 g (1 mmol) of dry ammonium acetate were added. The resulting mixture was stirred at room temperature for 4 h (TLC controlled). After the reaction completion, the mixture was cooled to 0-5 °C then precipitated product was filtered, washed with cold ethanol and dried in a vacuum desiccator over CaCl<sub>2</sub> to constant weight. Mp 172–173 °C (dec.). <sup>1</sup>H NMR (500.13 MHz, DMSO-*d*<sub>6</sub>): δ 1.68 (3H, s, CH<sub>3</sub>), 6.90 (1H, t, *J* = 7.6 Hz, C<sub>6</sub>H<sub>4</sub>), 6.95 (1H, d, *J* = 8.2 Hz, C<sub>6</sub>H<sub>4</sub>), 7.16 (1H, s, OH pyrrol), 7.29-7.34 (1H, m, C<sub>6</sub>H<sub>4</sub>), 7.67-7.69 (1H, m, C<sub>6</sub>H<sub>4</sub>), 8.10 (1H, d, *J* = 16.4 Hz, CH=), 10.51 (1H, s, OH), 10.61 (1H, s, OH). <sup>13</sup>C NMR (125.67 MHz, DMSO-*d*<sub>6</sub>): δ 27.05, 45.25, 94.71, 100.07, 113.09, 115.29, 116.49, 117.10, 117.65, 121.05, 120.71, 130.57, 134.31, 143.27, 158.99, 161.56, 172.63. MS, (EI, 70 eV): *m/z* (%) 304 [M]<sup>+</sup> (5), 286 [M-H<sub>2</sub>O]<sup>+</sup> (78). IR (mineral oil, cm<sup>-1</sup>): 3335-3200 (OH, NH), 2226 (CN). 1597 (C=C). Anal. Calcd for C<sub>17</sub>H<sub>12</sub>N<sub>4</sub>O<sub>2</sub>: C, 67.10; H, 3.97; N, 18.41. Found: C, 66.98; H, 4.08; N, 18.29.

*(E)*-2-(3-cyano-4-(2-hydroxy-5-nitrostyryl)-5,5-dimethylfuran-2(5*H*)-ylidene)malononitrile **1c**

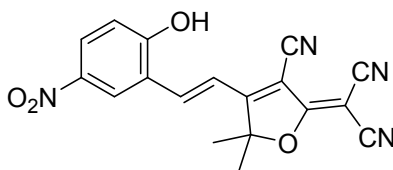

To a suspension of 0.199 g (1 mmol) of **TCF** acceptor in 2 mL of 96% ethanol 1.05 mmol of 2-hydroxy-5-nitrobenzaldehyde and 0.077 g (1 mmol) of dry ammonium acetate were added. The resulting mixture was stirred at room temperature for 4 h. Then to the obtained mixture 0.5 ml of 5% aqueous HCl was added, and stirring continued for additional 2 h. After the reaction completion (TLC controlled), the mixture was cooled to 5-10 °C then precipitated product was filtered, washed with cold ethanol and dried in a vacuum desiccator over CaCl<sub>2</sub> to constant weight. Mp 283–284 °C (dec.). <sup>1</sup>H NMR (500.13 MHz, DMSO-*d*<sub>6</sub>): δ 1.81 (6H, s, 2CH<sub>3</sub>), 7.11 (1H, d, *J* = 9.1 Hz, C<sub>6</sub>H<sub>3</sub>), 7.70 (1H, d, *J* = 16.6 Hz, CH=), 8.10 (1H, d, *J* = 16.6

Hz, CH=), 8.22 (1H, dd,  $J = 9.1, 2.9$  Hz, C<sub>6</sub>H<sub>3</sub>), 8.84 (1H, d,  $J = 2.9$  Hz, C<sub>6</sub>H<sub>3</sub>), 12.43 (1H, br. s, OH). <sup>13</sup>C NMR (125.67 MHz, DMSO-*d*<sub>6</sub>):  $\delta$  25.06, 54.65, 99.52, 99.74, 110.98, 111.82, 112.66, 117.16, 118.09, 121.58, 127.54, 128.27, 140.11, 141.83, 163.65, 175.79, 177.08. MS, (EI, 70 eV):  $m/z$  (%) 348 [M]<sup>+</sup> (33), 333 [M-Me]<sup>+</sup> (10), 263 (34). IR (mineral oil, cm<sup>-1</sup>): 3435 (OH, NH), 2235 (CN). 1572 (C=C). Anal. Calcd for C<sub>18</sub>H<sub>12</sub>N<sub>4</sub>O<sub>4</sub>: C, 62.07; H, 3.47; N, 16.09. Found: C, 61.96; H, 3.56; N, 15.95.

*(E)*-2-(3-cyano-5-hydroxy-4-(2-hydroxy-5-nitrostyryl)-5-methyl-1H-pyrrol-2(5H)-ylidene)malononitrile **1d**

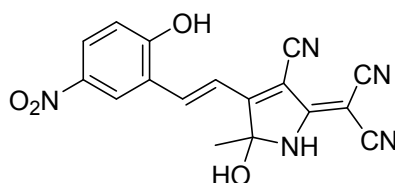

Prepared in a similar manner as compound **1c** using 0.2 g (1 mmol) of **HTCP** acceptor. Mp 219–220 °C (dec.). <sup>1</sup>H NMR (500.13 MHz, DMSO-*d*<sub>6</sub>):  $\delta$  1.71 (3H, s, CH<sub>3</sub>), 7.12 (1H, d,  $J = 9.1$  Hz, C<sub>6</sub>H<sub>3</sub>), 7.19 (1H, s, OH pyrrol), 7.51 (1H, d,  $J = 16.5$  Hz, CH=), 8.04 (1H, d,  $J = 16.5$  Hz, CH=), 8.19 (1H, dd,  $J = 9.1, 2.8$  Hz, C<sub>6</sub>H<sub>3</sub>), 8.62 (1H, d,  $J = 2.8$  Hz, C<sub>6</sub>H<sub>3</sub>), 12.21 (1H, br. s, OH). <sup>13</sup>C NMR (125.67 MHz, DMSO-*d*<sub>6</sub>):  $\delta$  25.92, 45.02, 94.05, 101.25, 112.02, 114.28, 115.52, 117.29, 119.01, 122.31, 125.96, 127.99, 139.78, 140.49, 160.48, 163.37, 171.00. MS, (EI, 70 eV):  $m/z$  (%) 349 [M]<sup>+</sup> (3), 333 (12), 331 [M-H<sub>2</sub>O]<sup>+</sup> (25). IR (mineral oil, cm<sup>-1</sup>): 3495–3150 (OH, NH), 2235 (CN). 1572 (C=C). Anal. Calcd for C<sub>17</sub>H<sub>11</sub>N<sub>5</sub>O<sub>4</sub>: C, 58.45; H, 3.17; N, 20.05. Found: C, 58.36; H, 3.26; N, 19.91.

*(E)*-2-(3-cyano-4-(2-hydroxy-5-methoxystyryl)-5,5-dimethylfuran-2(5H)-ylidene)malononitrile **1e**

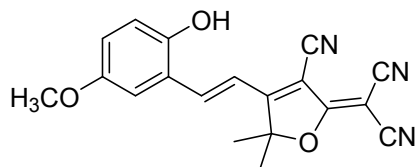

Prepared in a similar manner as compound **1a** using 1.05 mmol of 2-hydroxy-5-methoxybenzaldehyde. Mp 258–259 °C (dec.). <sup>1</sup>H NMR (500.13 MHz, DMSO-*d*<sub>6</sub>):  $\delta$  1.77 (6H, s, 2CH<sub>3</sub>), 3.76 (3H, s, OCH<sub>3</sub>), 6.98 (1H, d,  $J = 8.9$  Hz, C<sub>6</sub>H<sub>3</sub>), 7.01 (1H, dd,  $J = 8.9, 3.1$  Hz, C<sub>6</sub>H<sub>3</sub>), 7.39 (1H, d,  $J = 3.1$  Hz, C<sub>6</sub>H<sub>3</sub>), 7.43 (1H, d,  $J = 16.4$  Hz, CH=), 8.18 (1H, d,  $J = 16.4$  Hz, CH=), 10.42 (1H, s, OH). <sup>13</sup>C NMR (125.67 MHz, DMSO-*d*<sub>6</sub>):  $\delta$  25.20, 53.74, 55.74,

97.24, 99.16, 111.34, 112.04, 112.91, 113.08, 115.26, 117.57, 121.40, 121.67, 143.96, 152.45, 153.04, 176.28, 177.41. MS, (EI, 70 eV):  $m/z$  (%) 333  $[M]^+$  (72), 318  $[M-Me]^+$  (18), 248 (100). IR (mineral oil,  $\text{cm}^{-1}$ ): 3290 (OH), 2222 (CN). 1607 (C=C). Anal. Calcd for  $\text{C}_{19}\text{H}_{15}\text{N}_3\text{O}_3$ : C, 68.46; H, 4.54; N, 12.61. Found: C, 68.30; H, 4.64; N, 12.77.

*(E)*-2-(3-cyano-5-hydroxy-4-(2-hydroxy-5-methoxystyryl)-5-methyl-1H-pyrrol-2(5H)-ylidene)malononitrile **1f**

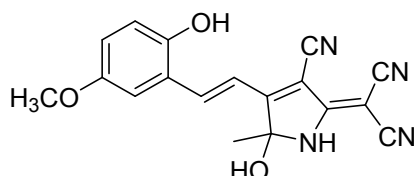

Prepared in a similar manner as compound **1b** using 1.05 mmol of 2-hydroxy-5-methoxybenzaldehyde. Mp 156–157 °C (dec.).  $^1\text{H}$  NMR (500.13 MHz,  $\text{DMSO}-d_6$ ):  $\delta$  1.68 (3H, s,  $\text{CH}_3$ ), 3.75 (3H, s,  $\text{OCH}_3$ ), 6.88 (1H, d,  $J = 8.9$  Hz,  $\text{C}_6\text{H}_3$ ), 6.96 (1H, dd,  $J = 8.9, 3.0$  Hz,  $\text{C}_6\text{H}_3$ ), 7.15 (1H, s, OH pyrrol), 7.20 (1H, d,  $J = 3.0$  Hz,  $\text{C}_6\text{H}_3$ ), 7.33 (1H, d,  $J = 16.4$  Hz,  $\text{CH=}$ ), 8.09 (1H, d,  $J = 16.4$  Hz,  $\text{CH=}$ ), 10.18 (1H, s, OH), 10.50 (1H, s, NH).  $^{13}\text{C}$  NMR (125.67 MHz,  $\text{DMSO}-d_6$ ):  $\delta$  25.87, 44.14, 55.69, 93.59, 98.83, 111.96, 112.08, 114.12, 115.35, 116.21, 117.49, 120.52, 121.73, 142.04, 152.29, 152.50, 160.47, 171.44. MS, (EI, 70 eV):  $m/z$  (%) 334  $[M]^+$  (2), 318 (71), 316  $[M-\text{H}_2\text{O}]^+$  (35). IR (mineral oil,  $\text{cm}^{-1}$ ): 3340–3205 (OH, NH), 2226 (CN). 1586 (C=C). Anal. Calcd for  $\text{C}_{18}\text{H}_{14}\text{N}_4\text{O}_3$ : C, 64.66; H, 4.22; N, 16.76. Found: C, 64.48; H, 4.35; N, 16.58.

## 2. Absorption spectra

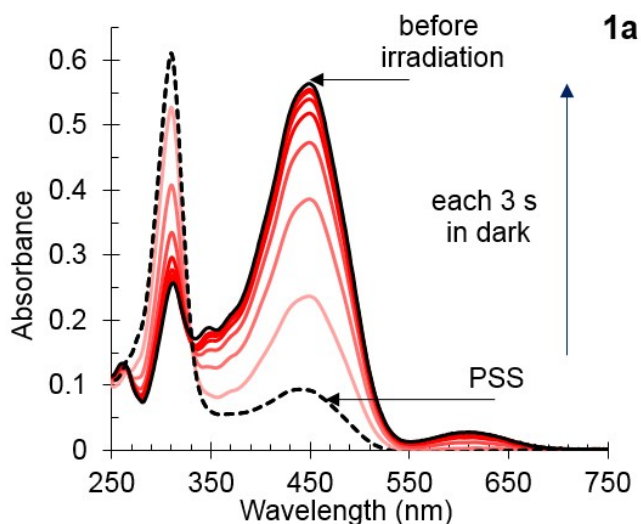

Fig. 1. Absorption spectra of the compound **1a** in EtOH ( $C=2.5 \times 10^{-5}$  M) before and after irradiation

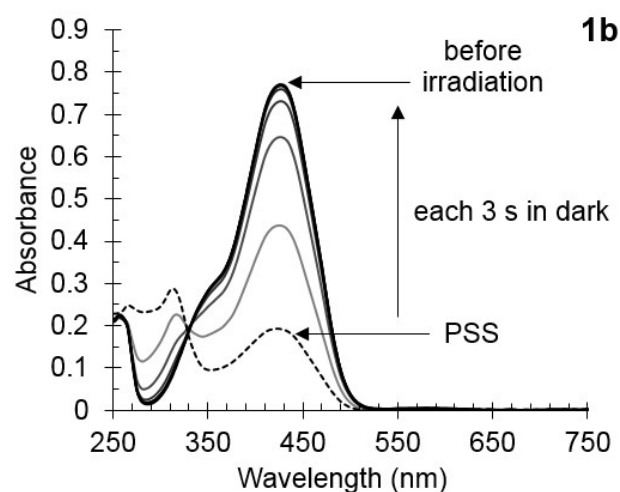

Fig. 2. Absorption spectra of the compound **1b** in EtOH ( $C=2.5 \times 10^{-5}$  M) before and after irradiation

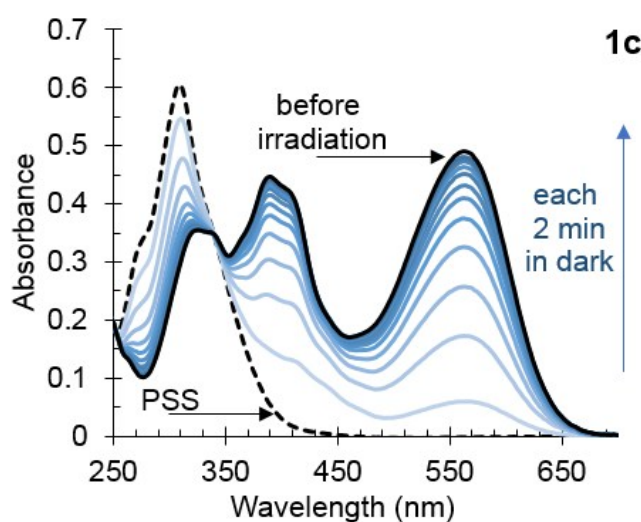

Fig. 3. Absorption spectra of the compound **1c** in EtOH ( $C=2.5 \times 10^{-5}$  M) before and after irradiation

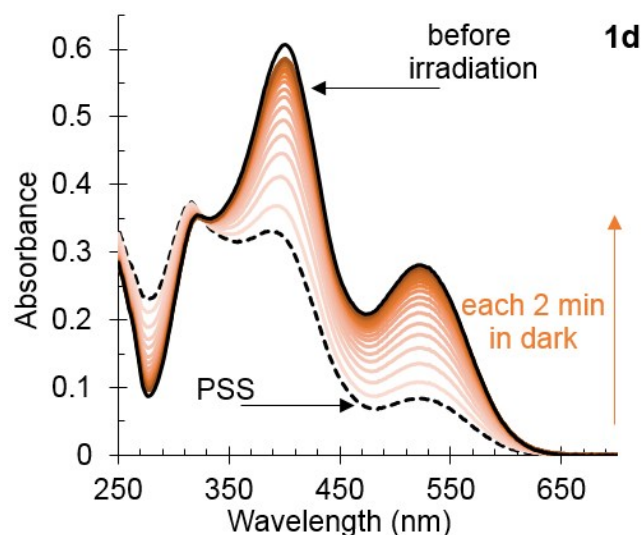

Fig. 4. Absorption spectra of the compound **1d** in EtOH ( $C=2.5 \times 10^{-5}$  M) before and after irradiation

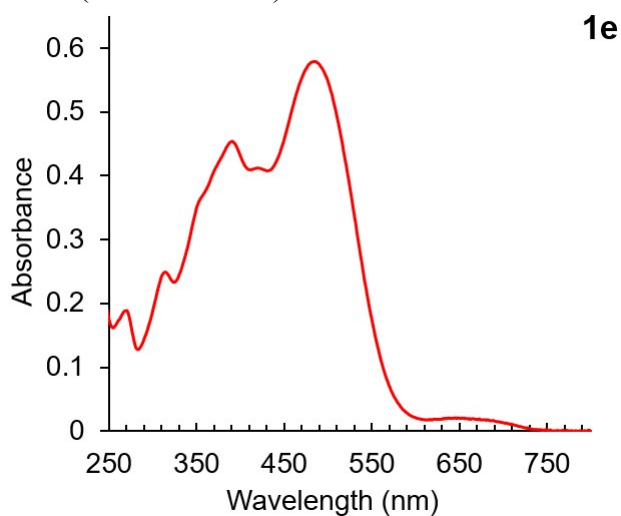

Fig. 5. Absorption spectrum of the compound **1e** in EtOH ( $C=2.5 \times 10^{-5}$  M)

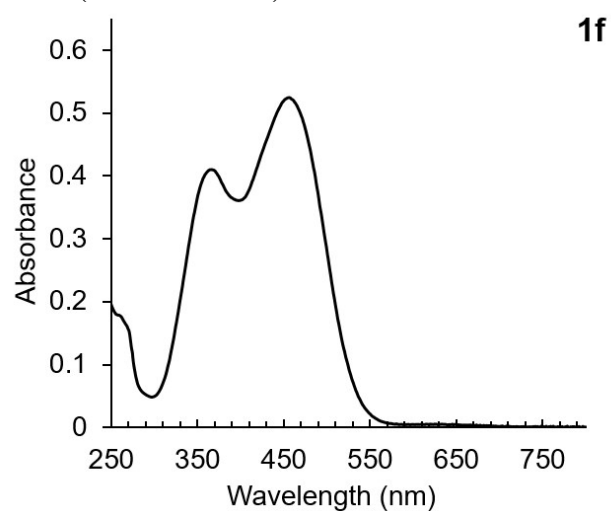

Fig. 6. Absorption spectrum of the compound **1f** in EtOH ( $C=2.5 \times 10^{-5}$  M)

### 3. Kinetic curves for the reverse thermal transformation

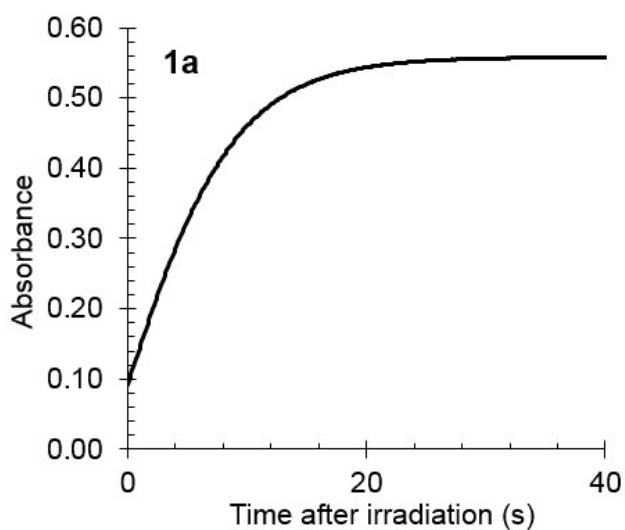

Fig. 7.1. Kinetics of the reverse thermal transformation for the compound **1a** (at 450 nm)

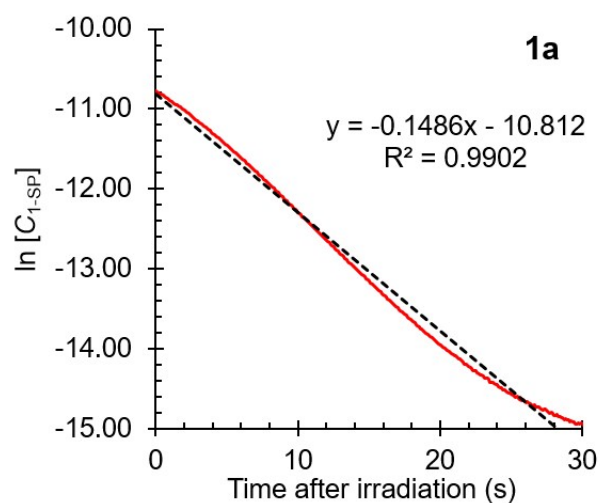

Fig. 7.2. Fitted kinetics of the reverse thermal transformation for the compound **1a** (at 450 nm)

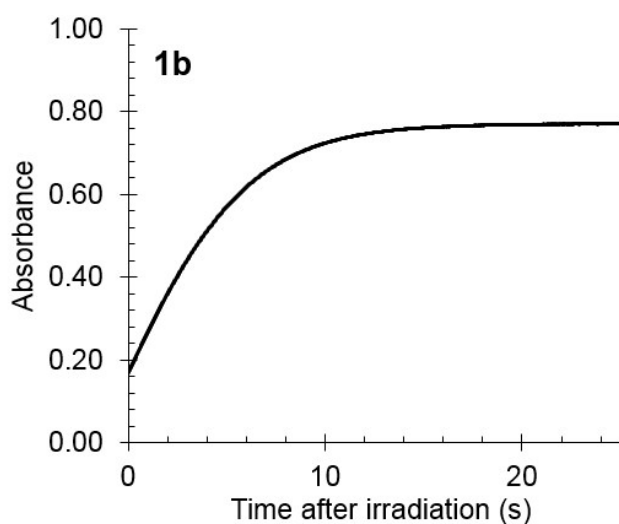

Fig. 8.1. Kinetics of the reverse thermal transformation for the compound **1b** (at 425 nm)

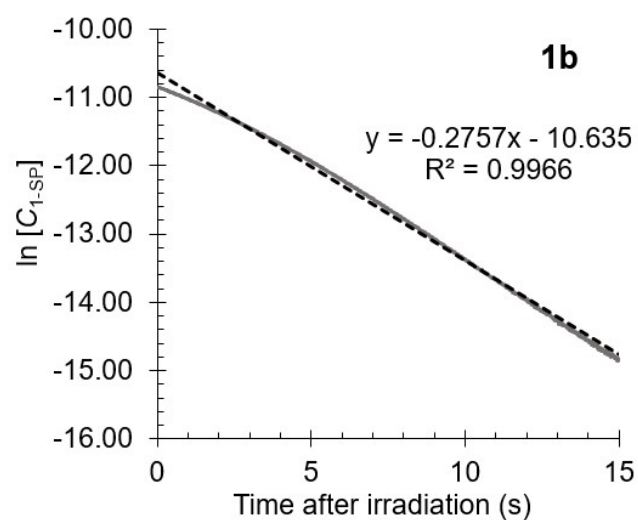

Fig. 8.2. Fitted kinetics of the reverse thermal transformation for the compound **1b** (at 425 nm)

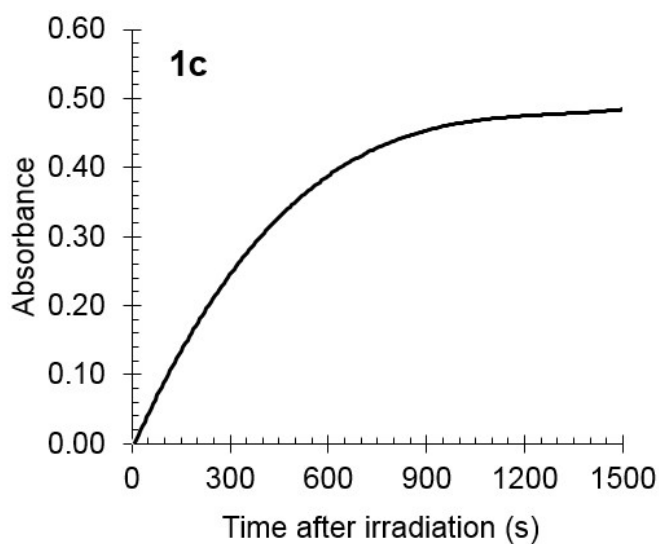

Fig. 9.1. Kinetics of the reverse thermal transformation for the compound **1c** (at 564 nm)

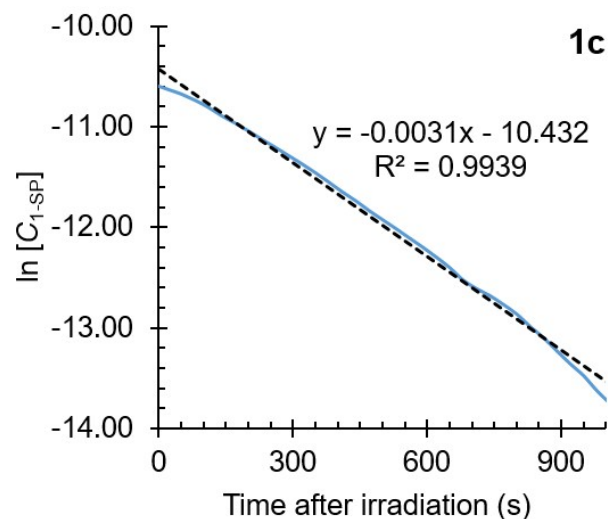

Fig. 9.2. Fitted kinetics of the reverse thermal transformation for the compound **1c** (at 564 nm)

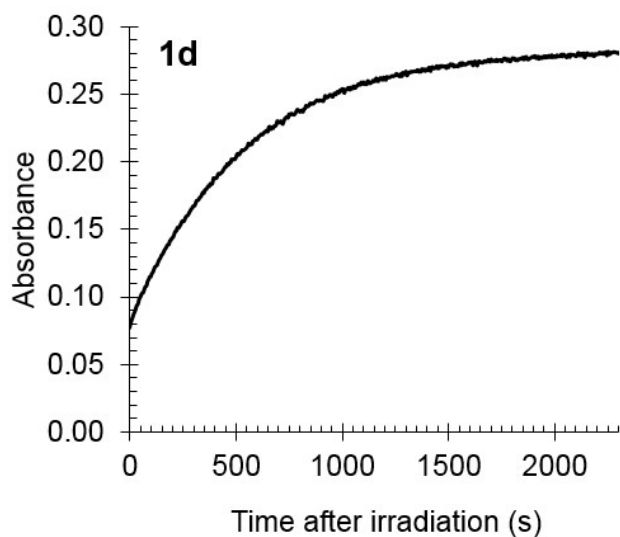

Fig. 10.1 Kinetics of the reverse thermal transformation for the compound **1d** (at 520 nm)

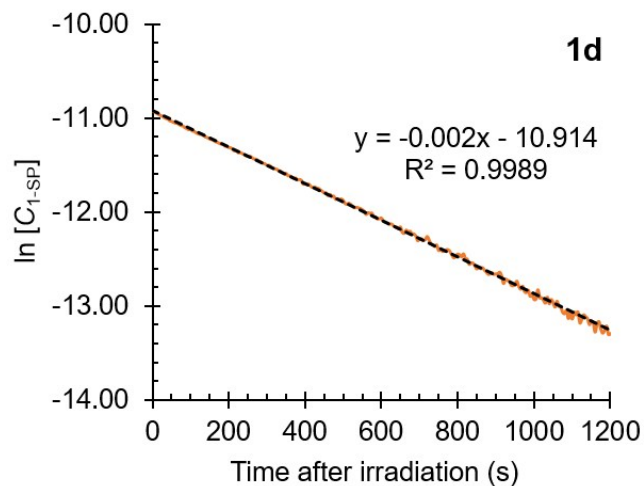

Fig. 10.2. Fitted kinetics of the reverse thermal transformation for the compound **1d** (at 520 nm)



#### 4. Fatigue resistance of the photo-thermal transformations

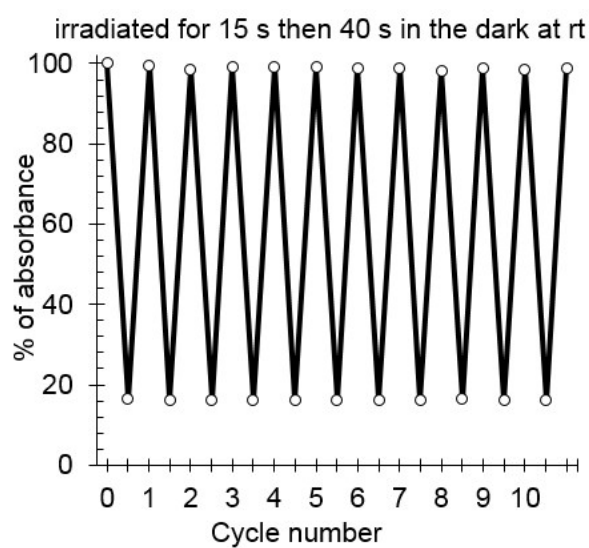

Fig. 11. Cyclicity of the photo-transformations of compound **1a** in EtOH (at 450 nm)

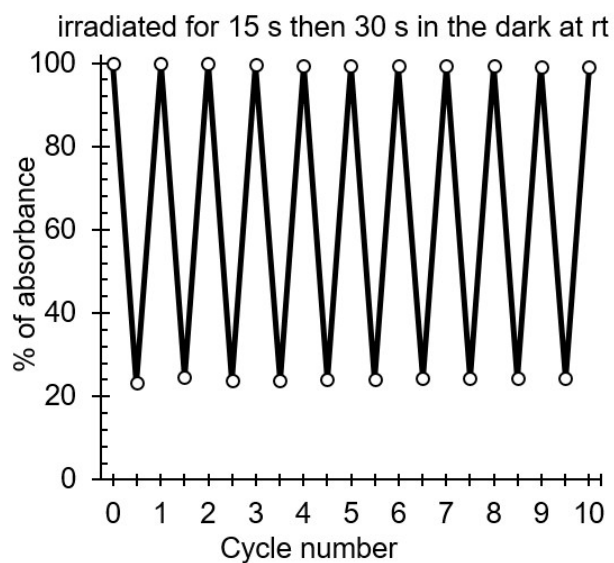

Fig. 12. Cyclicity of the photo-transformations of compound **1b** in EtOH (at 420 nm)

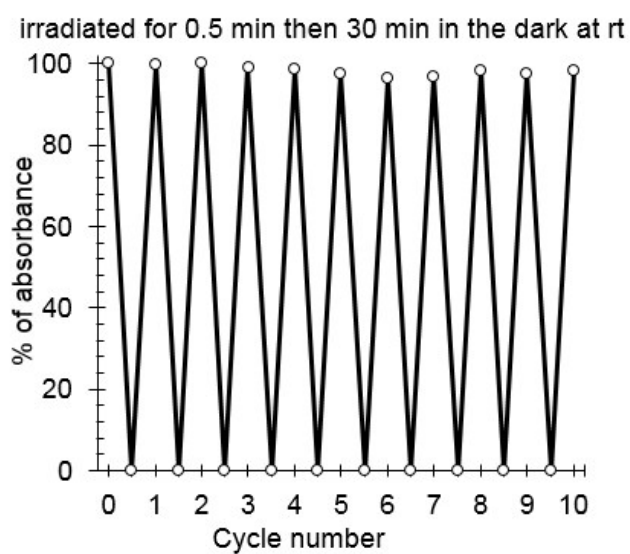

Fig. 13. Cyclicity of the photo-transformations of compound **1c** in EtOH (at 564 nm)

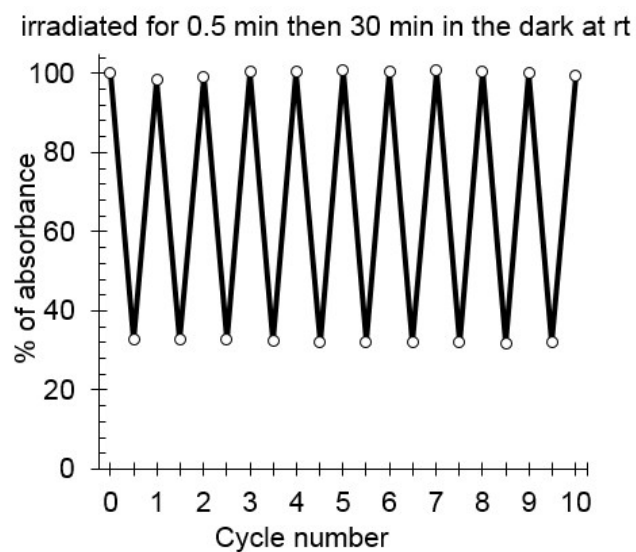

Fig. 14. Cyclicity of the photo-transformations of compound **1d** in EtOH (at 520 nm)

## 5. NMR $^1\text{H}$ , $^{13}\text{C}$ spectra

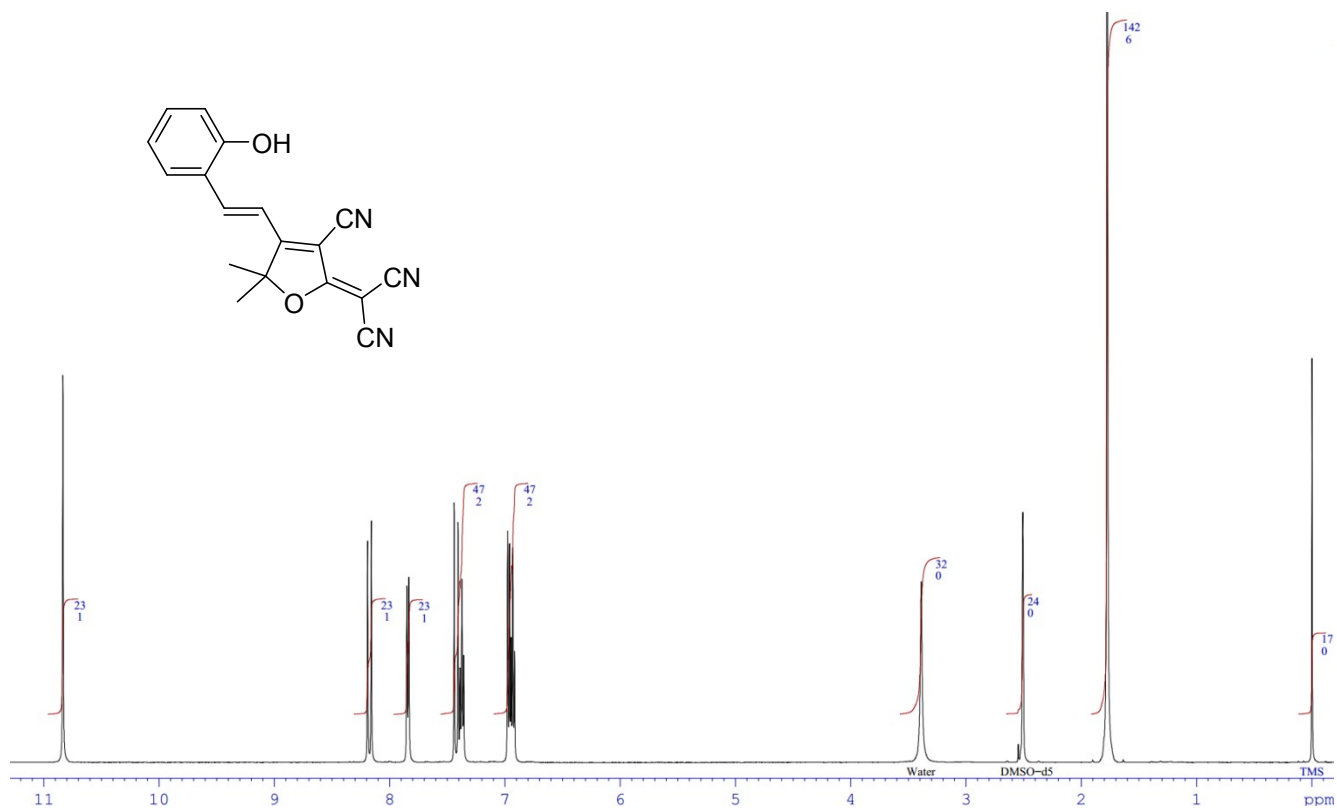

Fig. 15.  $^1\text{H}$ -NMR-spectrum of **1a** (500.13 MHz,  $\text{DMSO}-d_6$ , 293K)

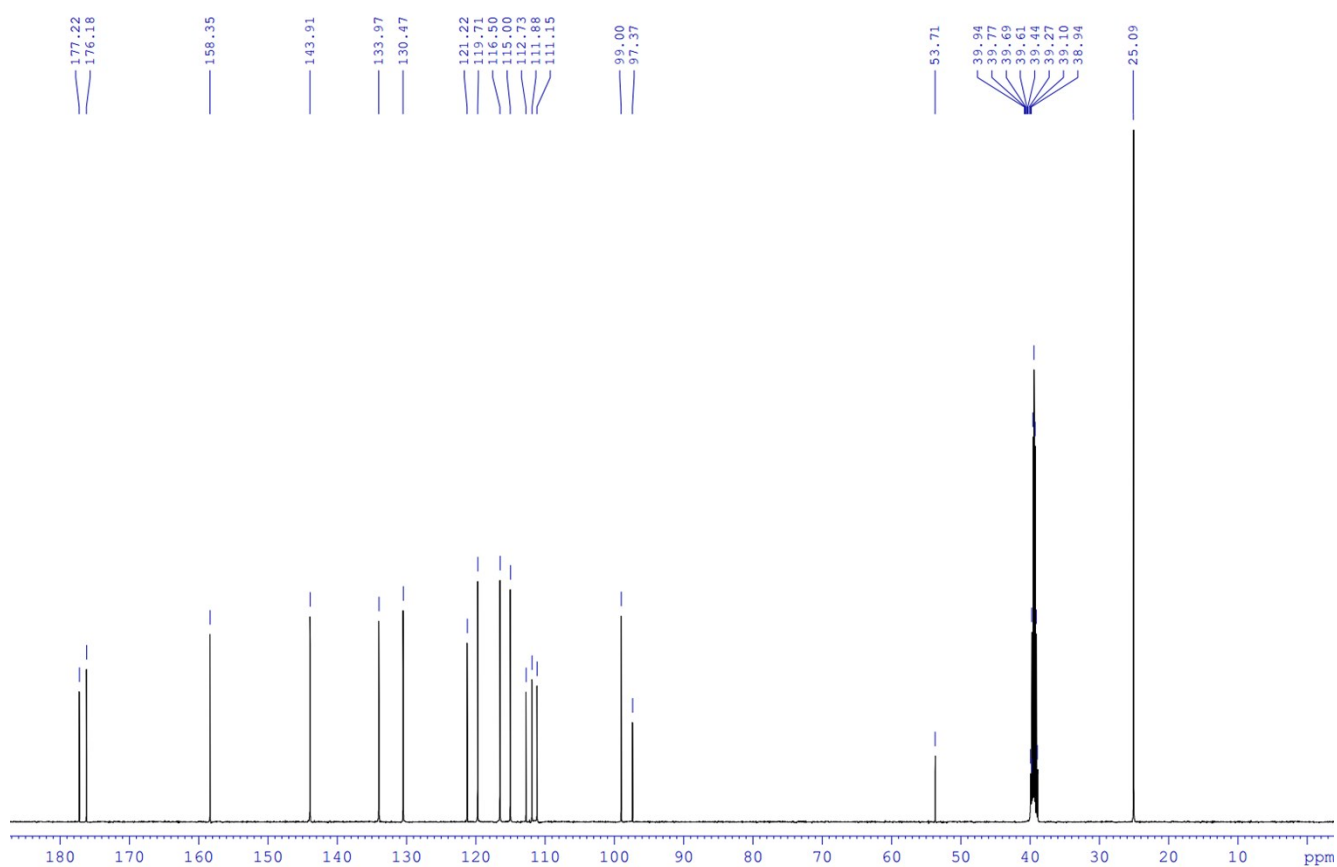

Fig. 16.  $^{13}\text{C}$ -NMR-spectrum of **1a** (125.76 MHz,  $\text{DMSO}-d_6$ , 296K)

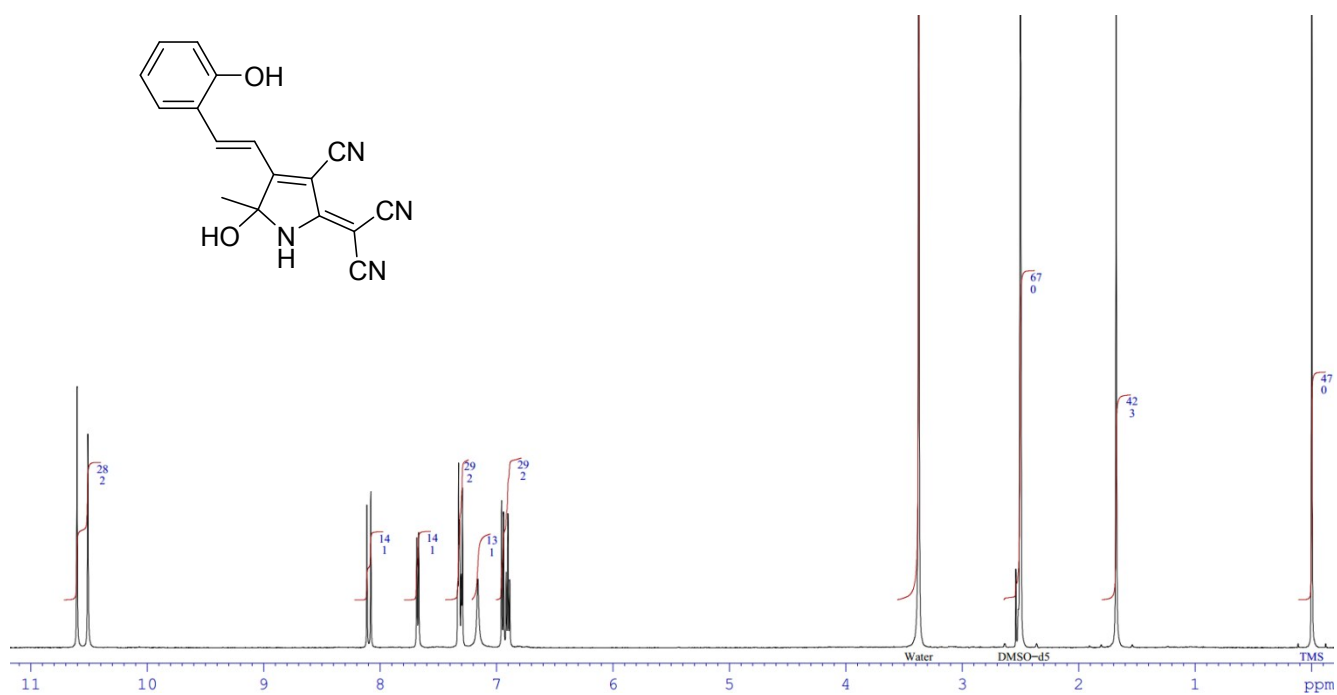

Fig. 17. <sup>1</sup>H-NMR-spectrum of **1b** (500.13 MHz, DMSO-*d*<sub>6</sub>, 293K)

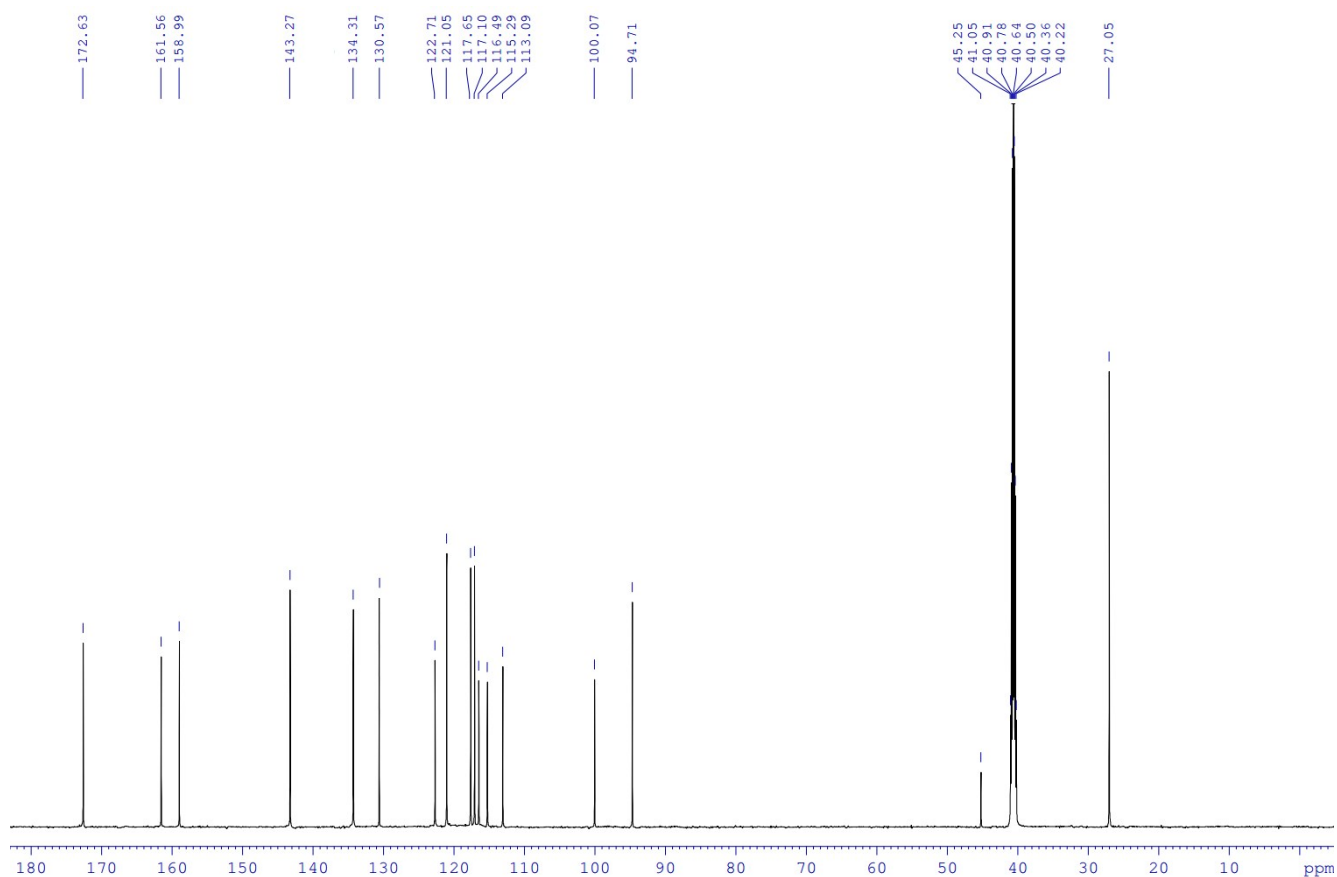

Fig. 18. <sup>13</sup>C-NMR-spectrum of **1b** (150.90 MHz, DMSO-*d*<sub>6</sub>, 296K)

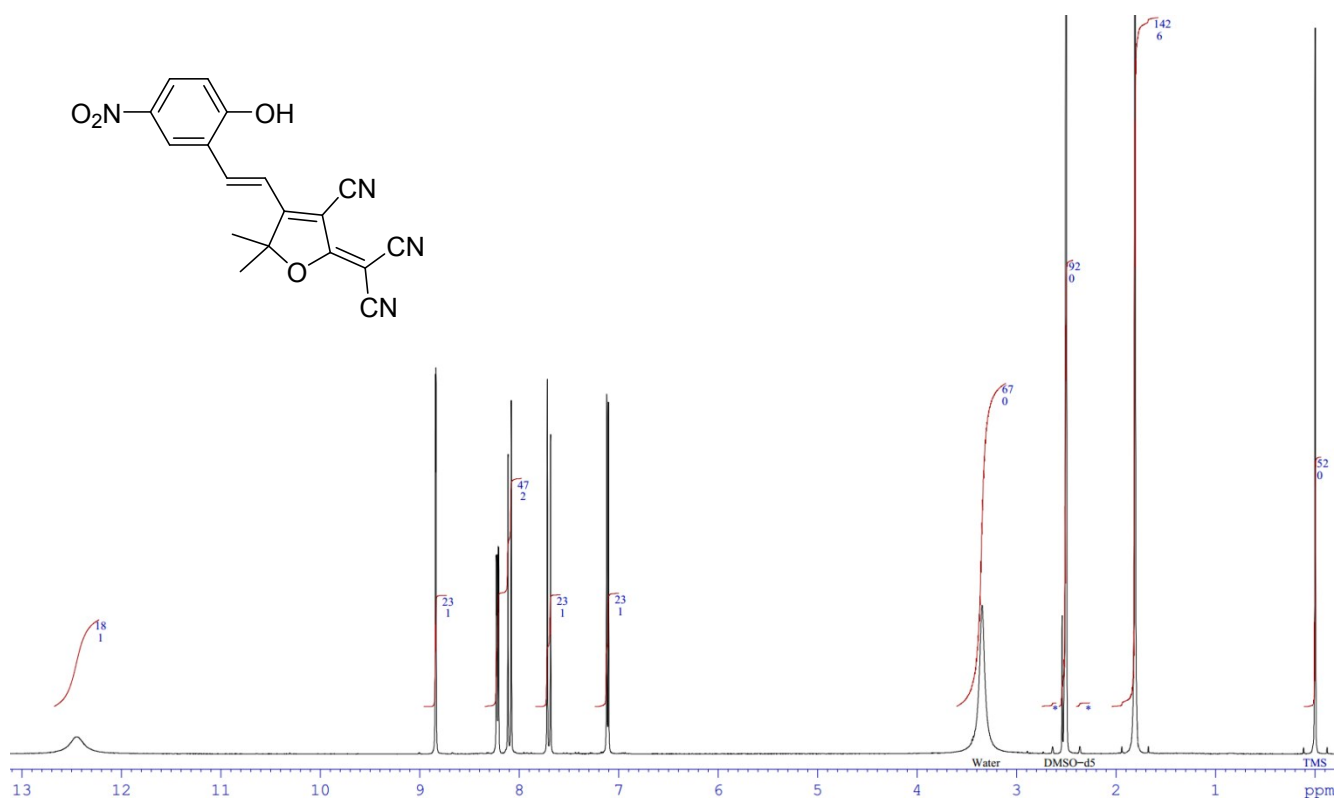

Fig. 19. <sup>1</sup>H-NMR-spectrum of **1c** (500.13 MHz, DMSO-*d*<sub>6</sub>, 300K)

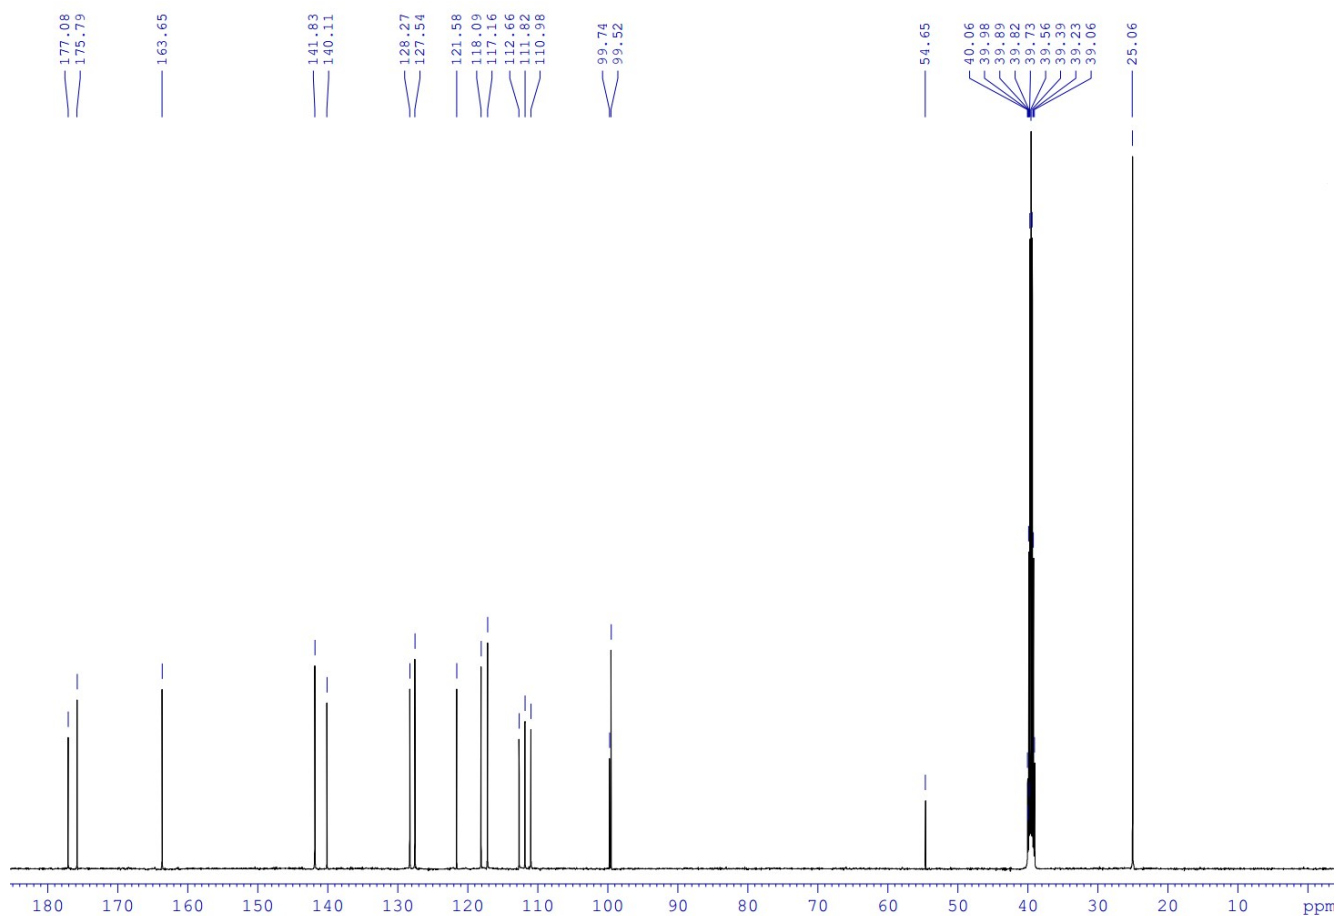

Fig. 20. <sup>13</sup>C-NMR-spectrum of **1c** (125.76 MHz, DMSO-*d*<sub>6</sub>, 299K)

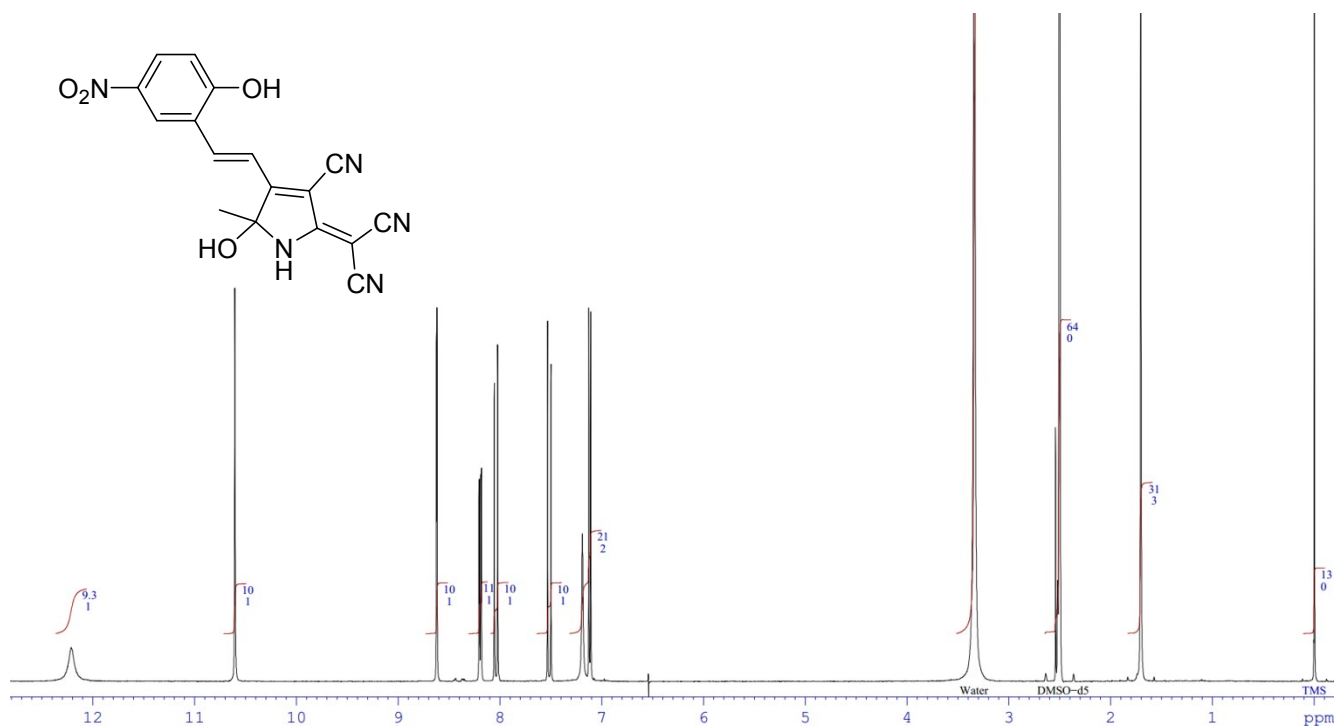

Fig. 21.  $^1\text{H}$ -NMR-spectrum of **1d** (500.13 MHz,  $\text{DMSO}-d_6$ , 298K)

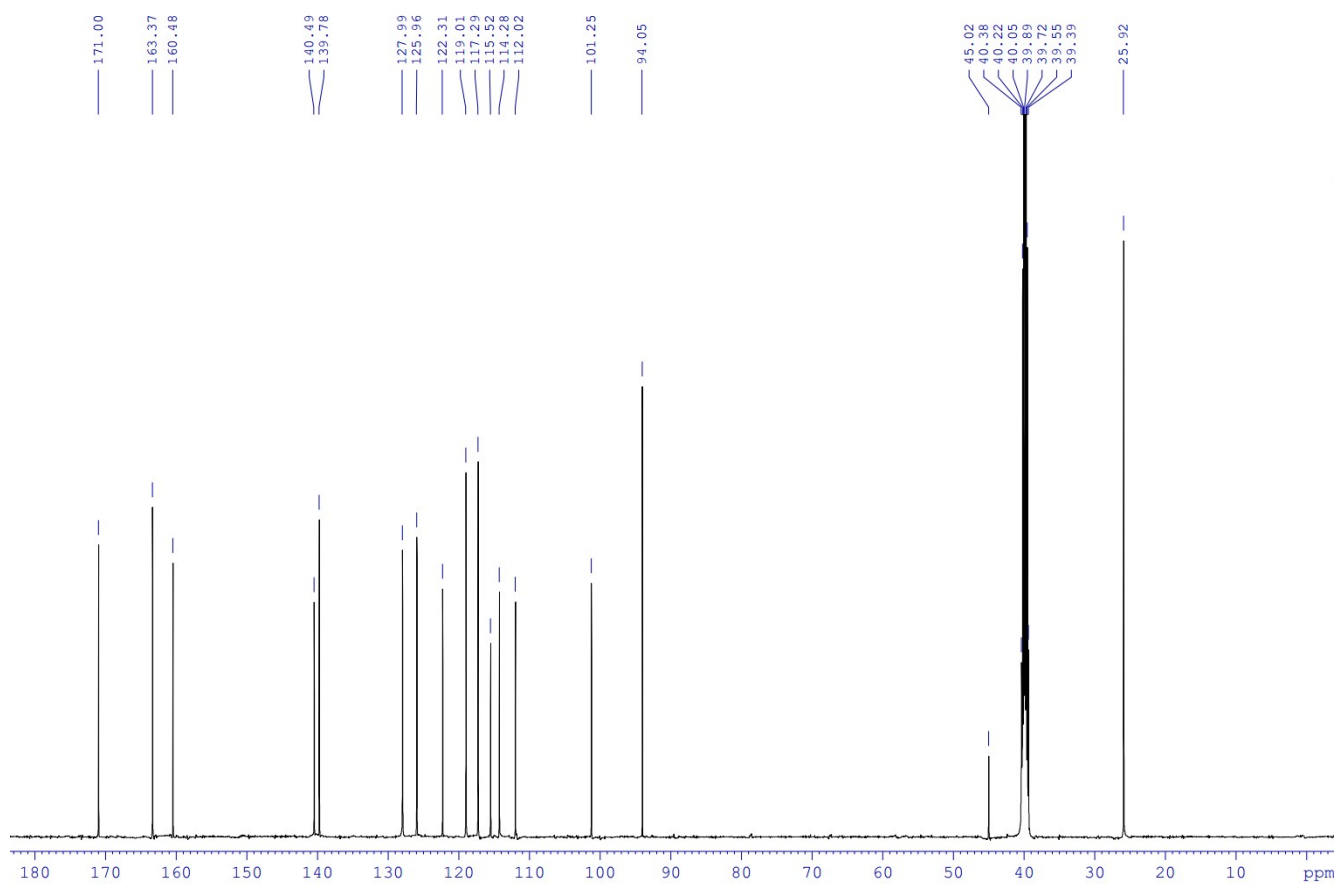

Fig. 22.  $^{13}\text{C}$ -NMR-spectrum of **1d** (125.76 MHz,  $\text{DMSO}-d_6$ , 296K)

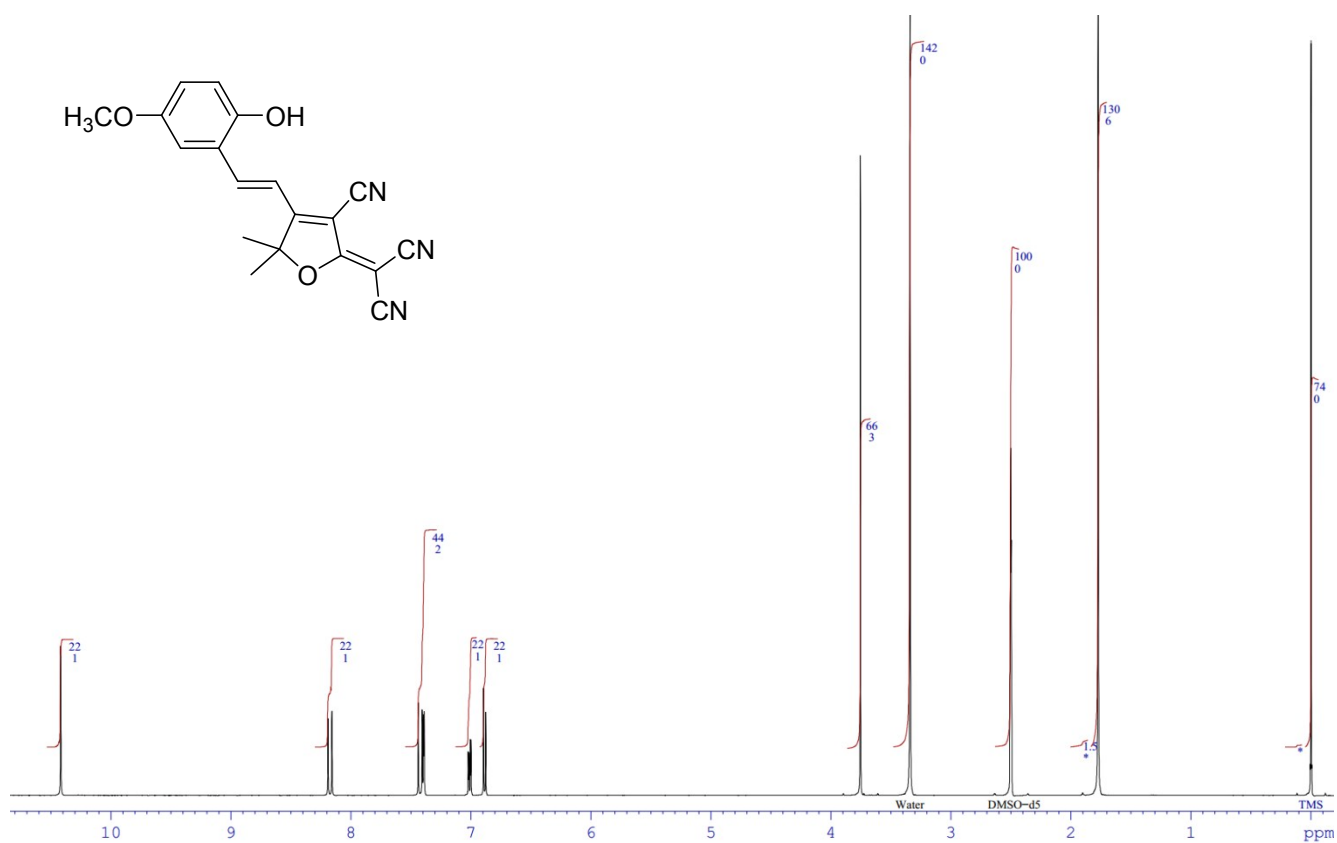

Fig. 23. <sup>1</sup>H-NMR-spectrum of **1e** (500.13 MHz, DMSO-*d*<sub>6</sub>, 293K)

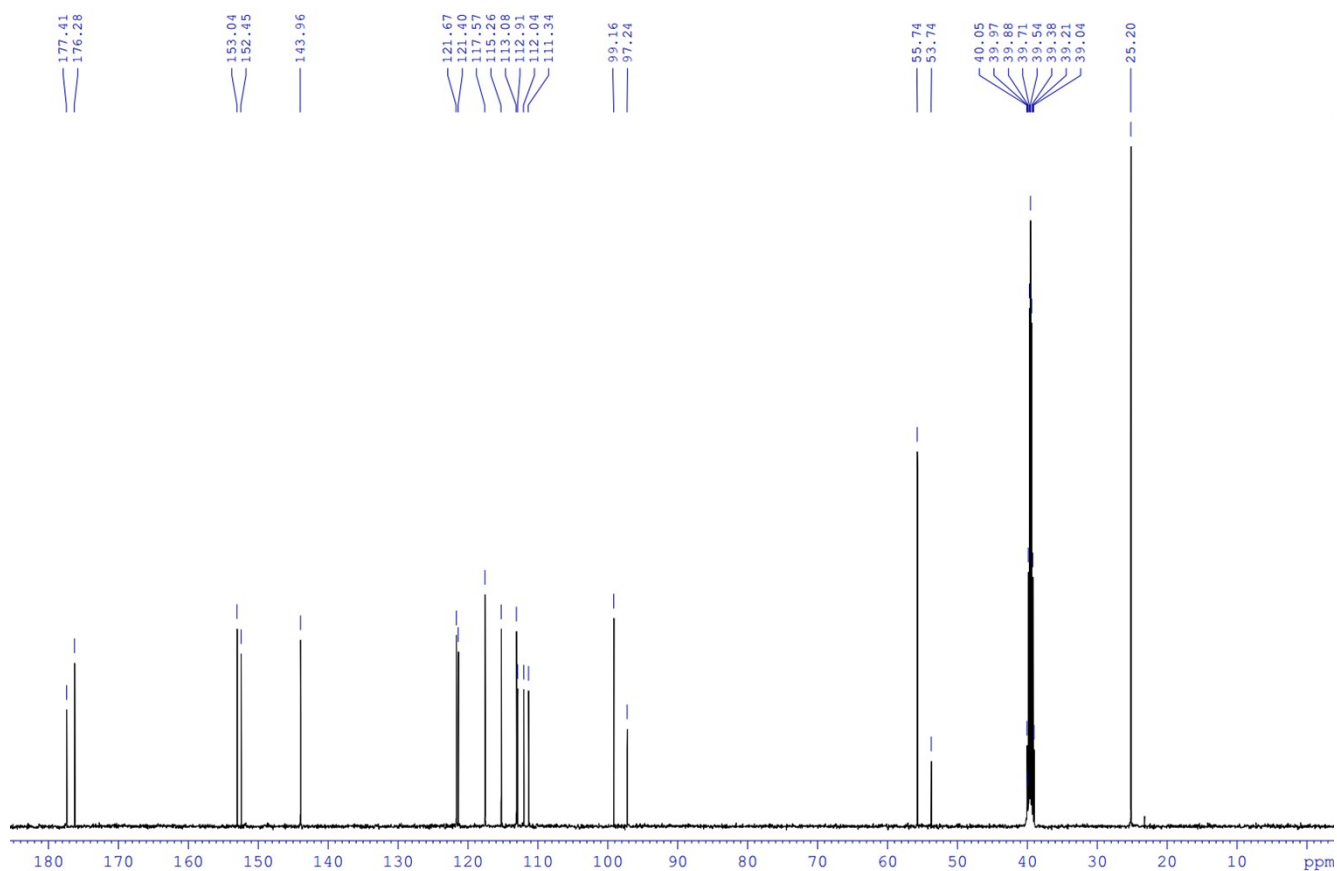

Fig. 24. <sup>13</sup>C-NMR-spectrum of **1e** (125.76 MHz, DMSO-*d*<sub>6</sub>, 296K)

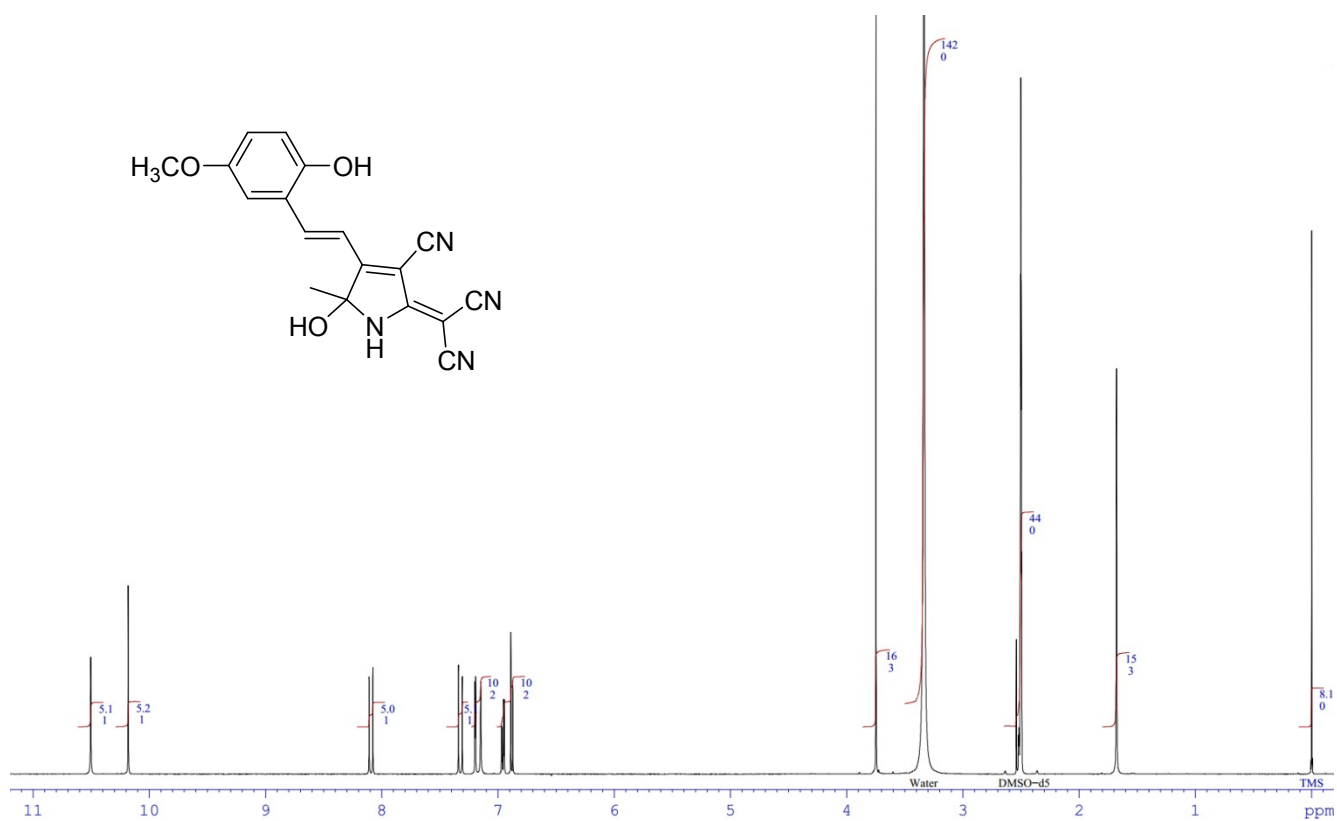

Fig. 25. <sup>1</sup>H-NMR-spectrum of **1f** (500.13 MHz, DMSO-*d*<sub>6</sub>, 293K)

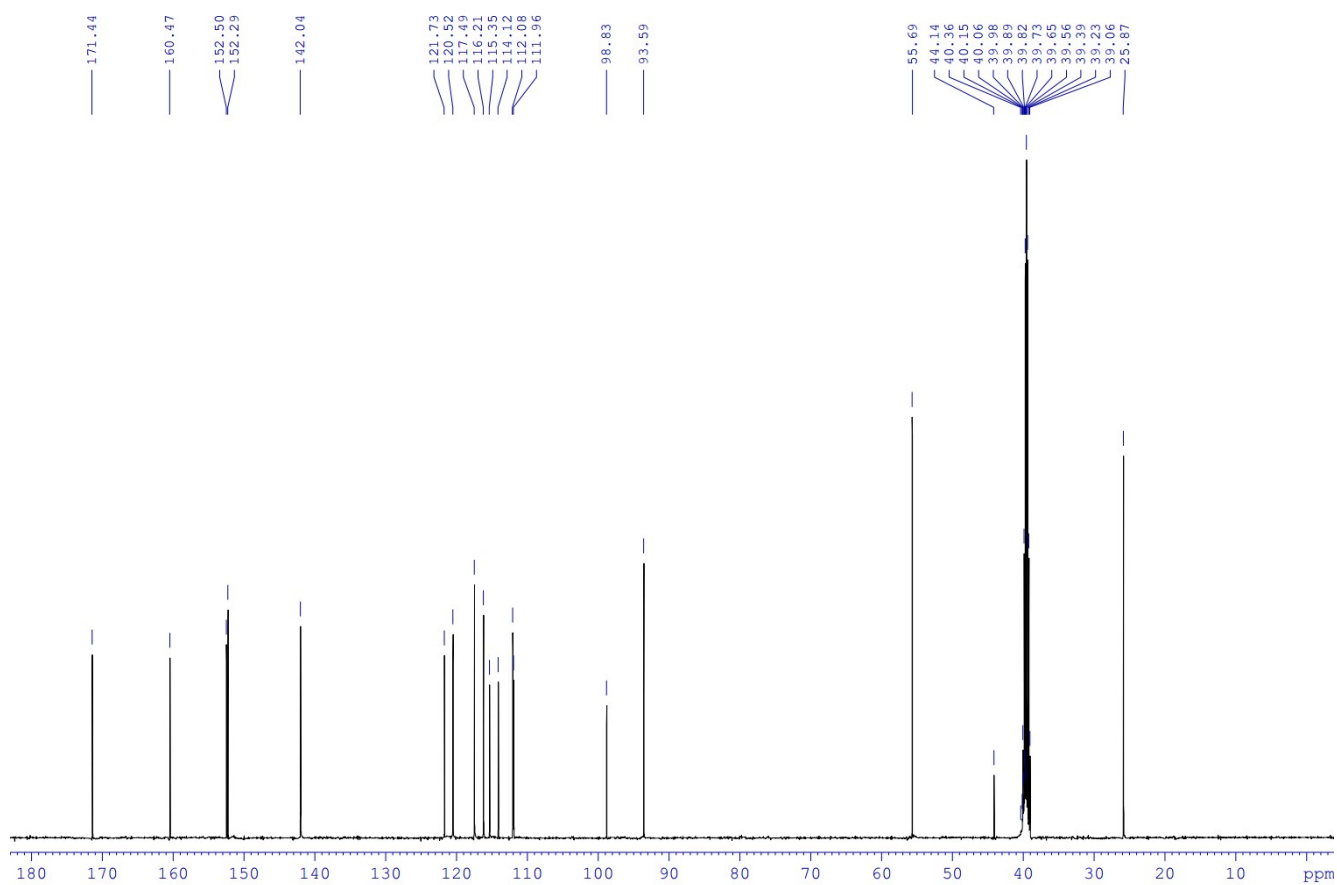

Fig. 26. <sup>13</sup>C-NMR-spectrum of **1f** (125.76 MHz, DMSO-*d*<sub>6</sub>, 296K)
